# Supplementary material for: Electron-transport-layer-free two-dimensional perovskite solar cells based on a flexible poly(3,4-ethylenedioxythiophene):poly(styrenesulfonate) cathode
Source: Royal Society of Chemistry journal article supplement (doi:10.1039/d1se00303h), 2021-01-01
Supplement: d1se00303h1.pdf [file d1se00303h1.pdf]

## Supporting Information for

# **Electron-transport-layer-free two-dimensional perovskite solar cells based on a flexible poly(3,4-ethylenedioxythiophene):poly(styrenesulfonate) cathode**

Zhihai Liu<sup>a</sup>, Lei Wang<sup>b</sup>, Chongyang Xu<sup>c,\*</sup> and Xiaoyin Xie<sup>d,\*</sup>

<sup>a</sup>*School of Opto-Electronic Information Science and Technology, Yantai University, Yantai 264005, China*

<sup>b</sup>*Department of Packing Engineering, Beijing Technology and Business University, Beijing, 100048, China*

<sup>c</sup>*School of Intelligent Science and Engineering, Harbin Engineering University, Harbin 150001, China*

<sup>d</sup>*School of Chemistry and Chemical Technology, Hubei Polytechnic University, Huangshi 435003, China*

\*Correspondence: xcy110@126.com (C. Xu) and xyxie@hbpu.edu.cn (X. Xie); Tel.: +86-714-6348814

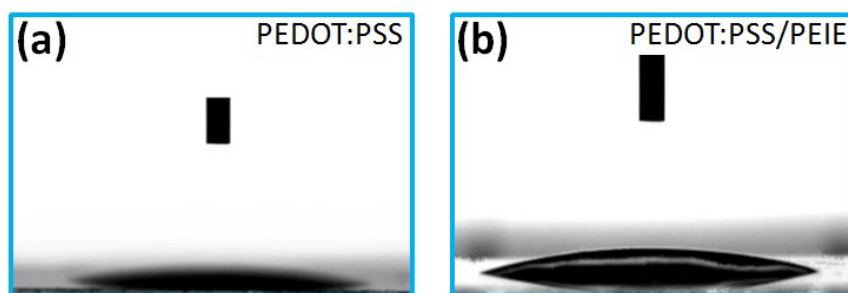

**Fig. S1.** Surface contact angle measurements of (a) PEDOT:PSS film and (b) PEDOT:PSS/PEIE film.

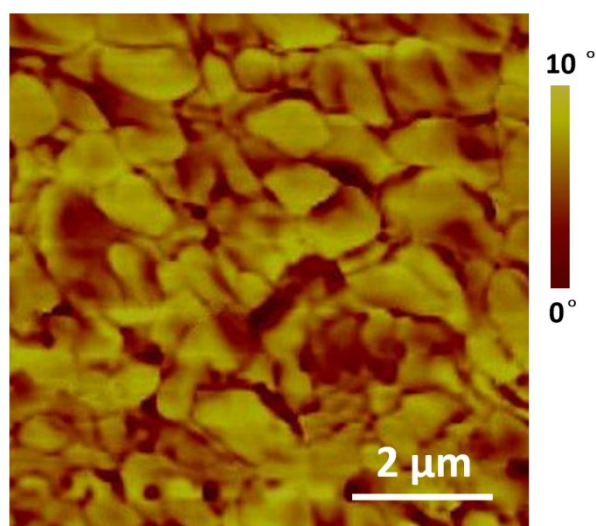

**Fig. S2.** AFM phase image of the prepared  $(\text{BA})_2(\text{MA})_3\text{Pb}_4\text{I}_{13}$  perovskite film.

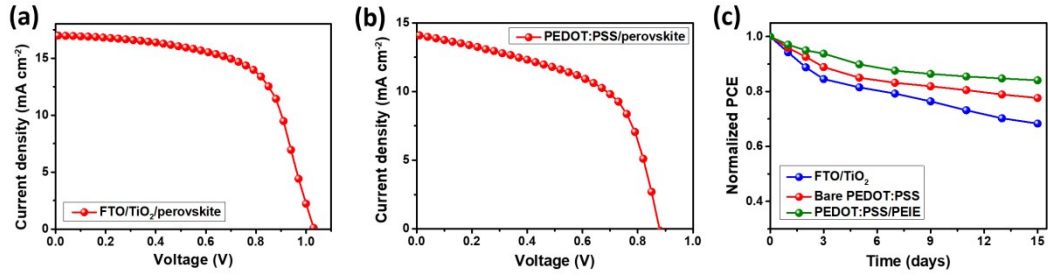

**Fig. S3.**  $J$ - $V$  characteristics of the PSCs based on a structure of (a) FTO/TiO<sub>2</sub> and (b) bare PEDOT:PSS; (c) Stability performance of the FTO/TiO<sub>2</sub>-, bare PEDOT:PSS- and PEDOT:PSS/PEIE-based PSCs, in terms of their normalized PCEs, plotted vs. time.

**Table S1.** Device parameters (under forward scans) of the PSCs using PEDOT:PSS/PEIE, bare PEDOT:PSS and FTO/TiO<sub>2</sub> as the cathode (on glass substrate).

| Configuration        | $V_{oc}$ (V)    | $J_{sc}$ (mA cm <sup>-2</sup> ) | FF (%)         | PCE (%)        |
|----------------------|-----------------|---------------------------------|----------------|----------------|
| PEDOT:PSS/PEIE       | $1.03 \pm 0.01$ | $15.3 \pm 0.3$                  | $64.6 \pm 1.3$ | $10.2 \pm 0.3$ |
| Bare PEDOT:PSS       | $0.88 \pm 0.01$ | $14.2 \pm 0.3$                  | $59.8 \pm 1.5$ | $7.5 \pm 0.3$  |
| FTO/TiO <sub>2</sub> | $1.02 \pm 0.01$ | $17.1 \pm 0.3$                  | $64.2 \pm 1.5$ | $11.2 \pm 0.3$ |

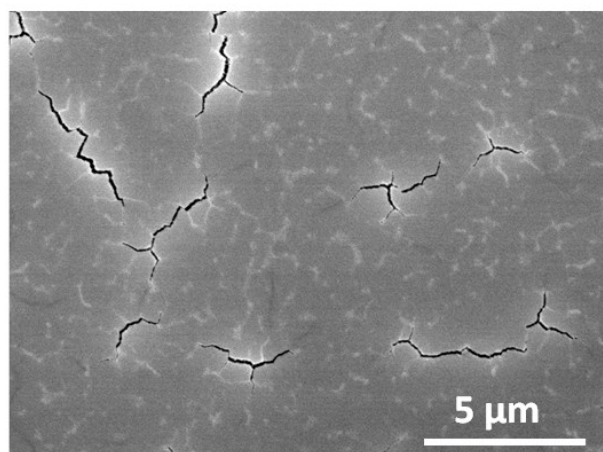

**Fig. S4.** SEM image of the perovskite film after the bending test.
